# Supplementary material for: HIV-1 envelope sequence-based diversity measures for identifying recent infections
Source: PubMed Central journal article supplement (PMC5746209; doi:10.1371/journal.pone.0189999), 2017-12-28
Supplement: pone.0189999.s003.pdf [file pone.0189999.s003.pdf]

**S2 Table. Sequence-based diversity measures expressed as the median/IQR and calculated from NGS of 7 segments representing 4 selected HIV-1 *env* GP120 conserved subdomains.**

| HIV-1 <i>env</i> segment | Sequence-based diversity measure | Recent HIV-1 infected population |             |                           | Chronic HIV-1 infected population |             |                           |
|--------------------------|----------------------------------|----------------------------------|-------------|---------------------------|-----------------------------------|-------------|---------------------------|
|                          |                                  | Median                           | IQR         | Nb of sample analyzed (n) | Median                            | IQR         | Nb of sample analyzed (n) |
| GP120-C2_1               | Percent diversity                | 0.01                             | [0.00-0.09] | 134                       | 0.01                              | [0.00-0.18] | 115                       |
|                          | Percent complexity               | 0.00                             | [0.00-0.00] | 134                       | 0.00                              | [0.00-0.02] | 115                       |
|                          | Shannon Entropy                  | 0.01                             | [0.00-0.16] | 134                       | 0.10                              | [0.00-0.26] | 115                       |
|                          | Number of Haplotypes             | 3                                | [1-13]      | 134                       | 5                                 | [1-20]      | 115                       |
| GP120-C2_2               | Percent diversity                | 0.01                             | [0.00-0.06] | 134                       | 0.01                              | [0.00-0.08] | 115                       |
|                          | Percent complexity               | 0.00                             | [0.00-0.00] | 134                       | 0.00                              | [0.00-0.00] | 115                       |
|                          | Shannon Entropy                  | 0.01                             | [0.00-0.13] | 134                       | 0.07                              | [0.00-0.25] | 115                       |
|                          | Number of Haplotypes             | 3                                | [1-10]      | 134                       | 5                                 | [1-17]      | 115                       |
| GP120-C2_3               | Percent diversity                | 0.01                             | [0.00-0.14] | 134                       | 0.02                              | [0.00-0.14] | 115                       |
|                          | Percent complexity               | 0.00                             | [0.00-0.00] | 134                       | 0.00                              | [0.00-0.00] | 115                       |
|                          | Shannon Entropy                  | 0.01                             | [0.00-0.18] | 134                       | 0.09                              | [0.00-0.32] | 115                       |
|                          | Number of Haplotypes             | 3                                | [1-12]      | 134                       | 6                                 | [1-25]      | 115                       |
| GP120-C3_1               | Percent diversity                | 0.01                             | [0.00-0.16] | 134                       | 0.02                              | [0.00-0.16] | 115                       |
|                          | Percent complexity               | 0.00                             | [0.00-0.00] | 134                       | 0.00                              | [0.00-0.00] | 115                       |
|                          | Shannon Entropy                  | 0.01                             | [0.00-0.19] | 134                       | 0.09                              | [0.00-0.30] | 115                       |
|                          | Number of Haplotypes             | 3                                | [1-14]      | 134                       | 5                                 | [1-28]      | 115                       |
| GP120-C3_2               | Percent diversity                | 0.01                             | [0.00-0.16] | 134                       | 0.02                              | [0.00-0.16] | 115                       |
|                          | Percent complexity               | 0.00                             | [0.00-0.00] | 134                       | 0.00                              | [0.00-0.01] | 115                       |
|                          | Shannon Entropy                  | 0.02                             | [0.00-0.35] | 134                       | 0.12                              | [0.00-0.25] | 115                       |
|                          | Number of Haplotypes             | 3                                | [1-5]       | 134                       | 8                                 | [1-12]      | 115                       |
| GP120-C4                 | Percent diversity                | 0.01                             | [0.00-0.09] | 134                       | 0.02                              | [0.00-0.19] | 115                       |
|                          | Percent complexity               | 0.00                             | [0.00-0.00] | 134                       | 0.00                              | [0.00-0.00] | 115                       |
|                          | Shannon Entropy                  | 0.01                             | [0.00-0.25] | 134                       | 0.09                              | [0.00-0.27] | 115                       |
|                          | Number of Haplotypes             | 3                                | [1-19]      | 134                       | 6                                 | [1-22]      | 115                       |
| GP120-C5                 | Percent diversity                | 0.01                             | [0.00-0.11] | 134                       | 0.01                              | [0.00-0.10] | 115                       |
|                          | Percent complexity               | 0.00                             | [0.00-0.01] | 134                       | 0.00                              | [0.00-0.00] | 115                       |
|                          | Shannon Entropy                  | 0.02                             | [0.00-0.26] | 134                       | 0.11                              | [0.00-0.34] | 115                       |
|                          | Number of Haplotypes             | 4                                | [1-18]      | 134                       | 6                                 | [1-22]      | 115                       |

| HIV-1 <i>env</i> segment | Sequence-based diversity measure | Recent HIV-1 infected population |             |                           | Chronic HIV-1 infected population |             |                           |
|--------------------------|----------------------------------|----------------------------------|-------------|---------------------------|-----------------------------------|-------------|---------------------------|
|                          |                                  | Median                           | IQR         | Nb of sample analyzed (n) | Median                            | IQR         | Nb of sample analyzed (n) |
| GP120-C2_1               | Percent diversity                | 0.01                             | [0.00-0.09] | 134                       | 0.01                              | [0.00-0.18] | 115                       |
|                          | Percent complexity               | 0.00                             | [0.00-0.00] | 134                       | 0.00                              | [0.00-0.02] | 115                       |
|                          | Shannon Entropy                  | 0.01                             | [0.00-0.16] | 134                       | 0.10                              | [0.00-0.26] | 115                       |
|                          | Number of Haplotypes             | 3                                | [1-13]      | 134                       | 5                                 | [1-20]      | 115                       |
| GP120-C2_2               | Percent diversity                | 0.01                             | [0.00-0.06] | 134                       | 0.01                              | [0.00-0.08] | 115                       |
|                          | Percent complexity               | 0.00                             | [0.00-0.00] | 134                       | 0.00                              | [0.00-0.00] | 115                       |
|                          | Shannon Entropy                  | 0.01                             | [0.00-0.13] | 134                       | 0.07                              | [0.00-0.25] | 115                       |
|                          | Number of Haplotypes             | 3                                | [1-10]      | 134                       | 5                                 | [1-17]      | 115                       |
| GP120-C2_3               | Percent diversity                | 0.01                             | [0.00-0.14] | 134                       | 0.02                              | [0.00-0.14] | 115                       |
|                          | Percent complexity               | 0.00                             | [0.00-0.00] | 134                       | 0.00                              | [0.00-0.00] | 115                       |
|                          | Shannon Entropy                  | 0.01                             | [0.00-0.18] | 134                       | 0.09                              | [0.00-0.32] | 115                       |
|                          | Number of Haplotypes             | 3                                | [1-12]      | 134                       | 6                                 | [1-25]      | 115                       |
| GP120-C3_1               | Percent diversity                | 0.01                             | [0.00-0.16] | 134                       | 0.02                              | [0.00-0.16] | 115                       |
|                          | Percent complexity               | 0.00                             | [0.00-0.00] | 134                       | 0.00                              | [0.00-0.00] | 115                       |
|                          | Shannon Entropy                  | 0.01                             | [0.00-0.19] | 134                       | 0.09                              | [0.00-0.30] | 115                       |
|                          | Number of Haplotypes             | 3                                | [1-14]      | 134                       | 5                                 | [1-28]      | 115                       |
| GP120-C3_2               | Percent diversity                | 0.01                             | [0.00-0.16] | 134                       | 0.02                              | [0.00-0.16] | 115                       |
|                          | Percent complexity               | 0.00                             | [0.00-0.00] | 134                       | 0.00                              | [0.00-0.01] | 115                       |
|                          | Shannon Entropy                  | 0.02                             | [0.00-0.35] | 134                       | 0.12                              | [0.00-0.25] | 115                       |
|                          | Number of Haplotypes             | 3                                | [1-5]       | 134                       | 8                                 | [1-12]      | 115                       |
| GP120-C4                 | Percent diversity                | 0.01                             | [0.00-0.09] | 134                       | 0.02                              | [0.00-0.19] | 115                       |
|                          | Percent complexity               | 0.00                             | [0.00-0.00] | 134                       | 0.00                              | [0.00-0.00] | 115                       |
|                          | Shannon Entropy                  | 0.01                             | [0.00-0.25] | 134                       | 0.09                              | [0.00-0.27] | 115                       |
|                          | Number of Haplotypes             | 3                                | [1-19]      | 134                       | 6                                 | [1-22]      | 115                       |
| GP120-C5                 | Percent diversity                | 0.01                             | [0.00-0.11] | 134                       | 0.01                              | [0.00-0.10] | 115                       |
|                          | Percent complexity               | 0.00                             | [0.00-0.01] | 134                       | 0.00                              | [0.00-0.00] | 115                       |
|                          | Shannon Entropy                  | 0.02                             | [0.00-0.26] | 134                       | 0.11                              | [0.00-0.34] | 115                       |
|                          | Number of Haplotypes             | 4                                | [1-18]      | 134                       | 6                                 | [1-22]      | 115                       |

Median differences between recent and chronic HIV-1 infected individuals for 4 sequence-based diversity measures of 7 *env* segments.

IQR: interquartile range.
