# Supplementary material for: HIV-1 envelope sequence-based diversity measures for identifying recent infections
Source: PubMed Central journal article supplement (PMC5746209; doi:10.1371/journal.pone.0189999), 2017-12-28
Supplement: pone.0189999.s004.pdf [file pone.0189999.s004.pdf]

**S3 Table. Sequence-based diversity measures expressed as the median/ IQR and calculated from NGS of 5 segments representing 5 selected HIV-1 *env* GP120 loop and 1 segment for a part of the GP41ectodomain (NHR).**

| HIV-1 <i>env</i> segment | Sequence-based diversity measure | Recent HIV-1 infected population |             |                               | Chronic HIV-1 infected population |             |                               |
|--------------------------|----------------------------------|----------------------------------|-------------|-------------------------------|-----------------------------------|-------------|-------------------------------|
|                          |                                  | Median                           | IQR         | Number of sample analyzed (n) | Median                            | IQR         | Number of sample analyzed (n) |
| GP120-V1                 | Percent diversity                | 0.01                             | [0.00-0.05] | 63                            | 0.02                              | [0.00-0.09] | 35                            |
|                          | Percent complexity               | 0.00                             | [0.00-0.18] | 63                            | 0.01                              | [0.00-0.25] | 35                            |
|                          | Shannon Entropy                  | 0.05                             | [0.00-0.31] | 63                            | 0.11                              | [0.00-0.54] | 35                            |
|                          | Number of Haplotypes             | 4                                | [1-7]       | 63                            | 6                                 | [1-12]      | 35                            |
| GP120-V2                 | Percent diversity                | 0.01                             | [0.00-0.06] | 102                           | 0.01                              | [0.01-0.09] | 77                            |
|                          | Percent complexity               | 0.00                             | [0.00-0.01] | 102                           | 0.00                              | 0.00-0.02   | 77                            |
|                          | Shannon Entropy                  | 0.02                             | [0.00-0.26] | 102                           | 0.12                              | [0.00-0.32] | 77                            |
|                          | Number of Haplotypes             | 4                                | [1-13]      | 102                           | 8                                 | [2-26]      | 77                            |
| GP120-V3                 | Percent diversity                | 0.01                             | [0.00-0.16] | 134                           | 0.02                              | [0.00-0.17] | 115                           |
|                          | Percent complexity               | 0.00                             | [0.00-0.00] | 134                           | 0.00                              | [0.00-0.00] | 115                           |
|                          | Shannon Entropy                  | 0.02                             | [0.00-0.24] | 134                           | 0.12                              | [0.00-0.32] | 115                           |
|                          | Number of Haplotypes             | 3                                | [1-16]      | 134                           | 7                                 | [2-22]      | 115                           |
| GP120-V4                 | Percent diversity                | 0.01                             | [0.00-0.13] | 134                           | 0.02                              | [0.00-0.14] | 115                           |
|                          | Percent complexity               | 0.00                             | [0.00-0.00] | 134                           | 0.00                              | [0.00-0.00] | 115                           |
|                          | Shannon Entropy                  | 0.01                             | [0.00-0.23] | 134                           | 0.10                              | [0.00-0.27] | 115                           |
|                          | Number of Haplotypes             | 3                                | [1-17]      | 134                           | 6                                 | [2-23]      | 115                           |
| GP120-V5                 | Percent diversity                | 0.02                             | [0.00-0.14] | 134                           | 0.03                              | [0.00-0.17] | 115                           |
|                          | Percent complexity               | 0.00                             | [0.00-0.00] | 134                           | 0.00                              | [0.00-0.00] | 115                           |
|                          | Shannon Entropy                  | 0.01                             | [0.00-0.14] | 134                           | 0.06                              | [0.00-0.25] | 115                           |
|                          | Number of Haplotypes             | 3                                | [1-13]      | 134                           | 4                                 | [1-21]      | 115                           |
| GP41-NHR                 | Percent diversity                | 0.01                             | [0.00-0.05] | 131                           | 0.01                              | [0.01-0.05] | 107                           |
|                          | Percent complexity               | 0.00                             | [0.00-0.08] | 131                           | 0.00                              | [0.00-0.13] | 107                           |
|                          | Shannon Entropy                  | 0.05                             | [0.00-0.30] | 131                           | 0.13                              | [0.00-0.42] | 107                           |
|                          | Number of Haplotypes             | 5                                | [1-20]      | 131                           | 7                                 | [2-35]      | 107                           |

*Median differences between recent and chronic infected individuals 4 sequence-based diversity measures of 6 env segments. IQR: interquartile range.*
