# Supplementary material for: HIV-1 envelope sequence-based diversity measures for identifying recent infections
Source: PubMed Central journal article supplement (PMC5746209; doi:10.1371/journal.pone.0189999), 2017-12-28
Supplement: pone.0189999.s005.pdf [file pone.0189999.s005.pdf]

**S4 Table: Sequence-based diversity measures expressed as the mean with student t-test results comparing recent versus chronic HIV infected sequences by 13 env segments.**

| Env segment       | Diversity measure         | Infection     | N          | Mean            | Std. Deviation  | Std. Error Mean | t-test       | P value      | Observations |
|-------------------|---------------------------|---------------|------------|-----------------|-----------------|-----------------|--------------|--------------|--------------|
| <b>GP120 C2_1</b> | <b>Percent complexity</b> | <b>RECENT</b> | <b>134</b> | <b>4,31E-04</b> | <b>6,15E-04</b> | <b>5,31E-05</b> | <b>-2,79</b> | <b>0,006</b> | <b>NS</b>    |
|                   |                           | CHRONIC       | 115        | 1,03E-03        | 2,38E-03        | 2,22E-04        |              |              |              |
|                   | Percent diversity         | RECENT        | 134        | 1,27E-02        | 1,15E-02        | 9,92E-04        | -5,44        | 0,000        | S            |
|                   |                           | CHRONIC       | 115        | 2,41E-02        | 2,08E-02        | 1,94E-03        |              |              |              |
|                   | Shannon entropy index     | RECENT        | 134        | 3,03E-02        | 3,51E-02        | 3,03E-03        | -10,1        | 0,000        | S            |
|                   |                           | CHRONIC       | 115        | 1,05E-01        | 7,62E-02        | 7,11E-03        |              |              |              |
|                   | Number of haplotypes      | RECENT        | 134        | 3,25E+00        | 2,00E+00        | 1,73E-01        | -8,23        | 0,000        | S            |
|                   |                           | CHRONIC       | 115        | 6,96E+00        | 4,74E+00        | 4,42E-01        |              |              |              |
| <b>GP120 C2_2</b> | Percent complexity        | RECENT        | 134        | 1,76E-04        | 2,08E-04        | 1,80E-05        | -4,04        | 0,000        | S            |
|                   |                           | CHRONIC       | 115        | 3,59E-04        | 4,73E-04        | 4,41E-05        |              |              |              |
|                   | Percent diversity         | RECENT        | 134        | 1,21E-02        | 8,47E-03        | 7,32E-04        | -6,27        | 0,000        | S            |
|                   |                           | CHRONIC       | 115        | 2,13E-02        | 1,42E-02        | 1,32E-03        |              |              |              |
|                   | Shannon entropy index     | RECENT        | 134        | 2,54E-02        | 3,08E-02        | 2,66E-03        | -8,83        | 0,000        | S            |
|                   |                           | CHRONIC       | 115        | 8,21E-02        | 6,64E-02        | 6,20E-03        |              |              |              |
|                   | Number of haplotypes      | RECENT        | 134        | 3,09E+00        | 1,88E+00        | 1,62E-01        | -7,5         | 0,000        | S            |
|                   |                           | CHRONIC       | 115        | 5,97E+00        | 3,95E+00        | 3,68E-01        |              |              |              |
| <b>GP120 C2_3</b> | Percent complexity        | RECENT        | 134        | 2,55E-04        | 3,38E-04        | 2,92E-05        | -4,35        | 0,000        | S            |
|                   |                           | CHRONIC       | 115        | 5,84E-04        | 7,95E-04        | 7,41E-05        |              |              |              |
|                   | Percent diversity         | RECENT        | 134        | 1,44E-02        | 1,75E-02        | 1,51E-03        | -4,94        | 0,000        | S            |
|                   |                           | CHRONIC       | 115        | 2,86E-02        | 2,73E-02        | 2,55E-03        |              |              |              |
|                   | Shannon entropy index     | RECENT        | 134        | 2,80E-02        | 3,48E-02        | 3,00E-03        | -10,1        | 0,000        | S            |
|                   |                           | CHRONIC       | 115        | 1,00E-01        | 7,39E-02        | 6,89E-03        |              |              |              |
|                   | Number of haplotypes      | RECENT        | 134        | 3,23E+00        | 1,98E+00        | 1,71E-01        | -7,84        | 0,000        | S            |
|                   |                           | CHRONIC       | 115        | 6,79E+00        | 4,80E+00        | 4,48E-01        |              |              |              |

|                   |                           |               |            |                 |                 |                 |              |              |           |
|-------------------|---------------------------|---------------|------------|-----------------|-----------------|-----------------|--------------|--------------|-----------|
| <b>GP120 C3_1</b> | Percent complexity        | RECENT        | 134        | 2,56E-04        | 4,70E-04        | 4,06E-05        | -2,28        | 0,023        | S         |
|                   |                           | CHRONIC       | 115        | 3,89E-04        | 4,48E-04        | 4,17E-05        |              |              |           |
|                   | Percent diversity         | RECENT        | 134        | 2,03E-02        | 1,91E-02        | 1,65E-03        | -5,17        | 0,000        | S         |
|                   |                           | CHRONIC       | 115        | 3,69E-02        | 3,10E-02        | 2,89E-03        |              |              |           |
|                   | Shannon entropy index     | RECENT        | 134        | 3,01E-02        | 3,45E-02        | 2,98E-03        | -9,16        | 0,000        | S         |
|                   |                           | CHRONIC       | 115        | 9,29E-02        | 7,00E-02        | 6,53E-03        |              |              |           |
|                   | Number of haplotypes      | RECENT        | 134        | 3,36E+00        | 1,99E+00        | 1,72E-01        | -6,96        | 0,000        | S         |
|                   |                           | CHRONIC       | 115        | 6,52E+00        | 4,81E+00        | 4,48E-01        |              |              |           |
|                   |                           |               |            |                 |                 |                 |              |              |           |
| <b>GP120 C3_2</b> | <b>Percent complexity</b> | <b>RECENT</b> | <b>134</b> | <b>5,49E-04</b> | <b>1,19E-03</b> | <b>1,03E-04</b> | <b>-1,93</b> | <b>0,054</b> | <b>NS</b> |
|                   |                           | CHRONIC       | 115        | 8,40E-04        | 1,19E-03        | 1,11E-04        |              |              |           |
|                   | Percent diversity         | RECENT        | 134        | 1,74E-02        | 2,18E-02        | 1,88E-03        | -6,08        | 0,000        | S         |
|                   |                           | CHRONIC       | 115        | 3,72E-02        | 2,96E-02        | 2,76E-03        |              |              |           |
|                   | Shannon entropy index     | RECENT        | 134        | 4,46E-02        | 5,68E-02        | 4,90E-03        | -8,49        | 0,000        | S         |
|                   |                           | CHRONIC       | 115        | 1,15E-01        | 7,34E-02        | 6,84E-03        |              |              |           |
|                   | Number of haplotypes      | RECENT        | 134        | 4,01E+00        | 3,38E+00        | 2,92E-01        | -7,88        | 0,000        | S         |
|                   |                           | CHRONIC       | 115        | 8,18E+00        | 4,92E+00        | 4,59E-01        |              |              |           |
|                   |                           |               |            |                 |                 |                 |              |              |           |
| <b>GP120 C4</b>   | Percent complexity        | RECENT        | 134        | 3,64E-04        | 6,45E-04        | 5,57E-05        | -2,53        | 0,012        | S         |
|                   |                           | CHRONIC       | 115        | 5,60E-04        | 5,67E-04        | 5,29E-05        |              |              |           |
|                   | Percent diversity         | RECENT        | 134        | 2,01E-02        | 1,69E-02        | 1,46E-03        | -4,75        | 0,000        | S         |
|                   |                           | CHRONIC       | 115        | 3,48E-02        | 3,09E-02        | 2,88E-03        |              |              |           |
|                   | Shannon entropy index     | RECENT        | 134        | 3,62E-02        | 4,51E-02        | 3,90E-03        | -8,85        | 0,000        | S         |
|                   |                           | CHRONIC       | 115        | 1,05E-01        | 7,53E-02        | 7,02E-03        |              |              |           |
|                   | Number of haplotypes      | RECENT        | 134        | 3,92E+00        | 2,76E+00        | 2,38E-01        | -6,83        | 0,000        | S         |
|                   |                           | CHRONIC       | 115        | 7,35E+00        | 5,00E+00        | 4,66E-01        | -6,56        |              |           |
|                   |                           |               |            |                 |                 |                 |              |              |           |
| <b>GP120 C5</b>   | Percent complexity        | RECENT        | 134        | 8,42E-04        | 1,43E-03        | 1,23E-04        | -2,54        | 0,012        | S         |
|                   |                           | CHRONIC       | 115        | 1,28E-03        | 1,26E-03        | 1,18E-04        |              |              |           |
|                   | Percent diversity         | RECENT        | 134        | 1,33E-02        | 1,21E-02        | 1,05E-03        | -3,06        | 0,002        | S         |
|                   |                           | CHRONIC       | 115        | 1,85E-02        | 1,46E-02        | 1,36E-03        |              |              |           |
|                   | Shannon entropy index     | RECENT        | 134        | 4,47E-02        | 4,88E-02        | 4,22E-03        | -7,95        | 0,000        | S         |
|                   |                           | CHRONIC       | 115        | 1,14E-01        | 8,60E-02        | 8,02E-03        |              |              |           |

|                       |                           |               |           |                 |                 |                 |              |              |           |
|-----------------------|---------------------------|---------------|-----------|-----------------|-----------------|-----------------|--------------|--------------|-----------|
|                       | Number of haplotypes      | RECENT        | 134       | 4,28E+00        | 2,55E+00        | 2,21E-01        | -6,05        | 0,000        | S         |
|                       |                           | CHRONIC       | 115       | 7,28E+00        | 5,03E+00        | 4,69E-01        |              |              |           |
| <b>GP41 ECD (NHR)</b> | Percent complexity        | RECENT        | 131       | 6,80E-03        | 9,95E-03        | 8,69E-04        | -4,1         | 0,000        | S         |
|                       |                           | CHRONIC       | 107       | 1,54E-02        | 2,15E-02        | 2,07E-03        |              |              |           |
|                       | Percent diversity         | RECENT        | 131       | 1,06E-02        | 5,94E-03        | 5,19E-04        | -3,47        | 0,001        | S         |
|                       |                           | CHRONIC       | 107       | 1,33E-02        | 6,02E-03        | 5,82E-04        |              |              |           |
|                       | Shannon entropy index     | RECENT        | 131       | 7,04E-02        | 5,70E-02        | 4,98E-03        | -7,41        | 0,000        | S         |
|                       |                           | CHRONIC       | 107       | 1,54E-01        | 1,12E-01        | 1,08E-02        |              |              |           |
|                       | Number of haplotypes      | RECENT        | 131       | 5,53E+00        | 2,86E+00        | 2,50E-01        | -5,56        | 0,000        | S         |
|                       |                           | CHRONIC       | 107       | 8,70E+00        | 5,72E+00        | 5,53E-01        |              |              |           |
| <b>GP120 V1</b>       | <b>Percent complexity</b> | <b>RECENT</b> | <b>63</b> | <b>1,29E-02</b> | <b>2,61E-02</b> | <b>3,29E-03</b> | <b>-1,84</b> | <b>0,069</b> | <b>NS</b> |
|                       |                           | CHRONIC       | 35        | 2,65E-02        | 4,73E-02        | 7,99E-03        |              |              |           |
|                       | Percent diversity         | RECENT        | 63        | 1,98E-02        | 7,04E-03        | 8,87E-04        | -4,36        | 0,000        | S         |
|                       |                           | CHRONIC       | 35        | 3,06E-02        | 1,72E-02        | 2,90E-03        |              |              |           |
|                       | Shannon entropy index     | RECENT        | 63        | 7,01E-02        | 6,11E-02        | 7,70E-03        | -3,48        | 0,001        | S         |
|                       |                           | CHRONIC       | 35        | 1,35E-01        | 1,24E-01        | 2,10E-02        |              |              |           |
|                       | Number of haplotypes      | RECENT        | 63        | 5,76E+00        | 5,08E+00        | 6,40E-01        | -2,76        | 0,007        | S         |
|                       |                           | CHRONIC       | 35        | 9,57E+00        | 8,63E+00        | 1,46E+00        |              |              |           |
| <b>GP120 V2</b>       | Percent complexity        | RECENT        | 102       | 1,25E-03        | 2,08E-03        | 2,06E-04        | -3,87        | 0,000        | S         |
|                       |                           | CHRONIC       | 77        | 3,31E-03        | 4,80E-03        | 5,47E-04        |              |              |           |
|                       | Percent diversity         | RECENT        | 102       | 1,16E-02        | 9,62E-03        | 9,52E-04        | -6,47        | 0,000        | S         |
|                       |                           | CHRONIC       | 77        | 2,64E-02        | 2,04E-02        | 2,32E-03        |              |              |           |
|                       | Shannon entropy index     | RECENT        | 102       | 4,85E-02        | 5,12E-02        | 5,07E-03        | -7,59        | 0,000        | S         |
|                       |                           | CHRONIC       | 77        | 1,29E-01        | 9,03E-02        | 1,03E-02        |              |              |           |
|                       | Number of haplotypes      | RECENT        | 102       | 4,12E+00        | 2,34E+00        | 2,32E-01        | -7,22        | 0,000        | S         |
|                       |                           | CHRONIC       | 77        | 8,27E+00        | 5,15E+00        | 5,87E-01        |              |              |           |

|                 |                           |               |            |                 |                 |                 |              |              |           |
|-----------------|---------------------------|---------------|------------|-----------------|-----------------|-----------------|--------------|--------------|-----------|
| <b>GP120 V3</b> | Percent complexity        | RECENT        | 134        | 5,13E-04        | 8,34E-04        | 7,21E-05        | -4,2         | 0,000        | S         |
|                 |                           | CHRONIC       | 115        | 1,06E-03        | 1,20E-03        | 1,12E-04        |              |              |           |
|                 | Percent diversity         | RECENT        | 134        | 1,57E-02        | 1,94E-02        | 1,67E-03        | -5,87        | 0,000        | S         |
|                 |                           | CHRONIC       | 115        | 3,48E-02        | 3,13E-02        | 2,92E-03        |              |              |           |
|                 | Shannon entropy index     | RECENT        | 134        | 3,92E-02        | 4,49E-02        | 3,88E-03        | -10,2        | 0,000        | S         |
|                 |                           | CHRONIC       | 115        | 1,24E-01        | 8,29E-02        | 7,73E-03        |              |              |           |
|                 | Number of haplotypes      | RECENT        | 134        | 3,90E+00        | 2,65E+00        | 2,29E-01        | -8,97        | 0,000        | S         |
|                 |                           | CHRONIC       | 115        | 8,26E+00        | 4,85E+00        | 4,53E-01        |              |              |           |
| <b>GP120 V4</b> | Percent complexity        | RECENT        | 134        | 4,03E-04        | 6,82E-04        | 5,89E-05        | -2,69        | 0,008        | S         |
|                 |                           | CHRONIC       | 115        | 6,42E-04        | 7,20E-04        | 6,71E-05        |              |              |           |
|                 | Percent diversity         | RECENT        | 134        | 1,58E-02        | 1,63E-02        | 1,41E-03        | -5,56        | 0,000        | S         |
|                 |                           | CHRONIC       | 115        | 3,17E-02        | 2,79E-02        | 2,60E-03        |              |              |           |
|                 | Shannon entropy index     | RECENT        | 134        | 3,60E-02        | 4,67E-02        | 4,03E-03        | -8,86        | 0,000        | S         |
|                 |                           | CHRONIC       | 115        | 1,05E-01        | 7,52E-02        | 7,01E-03        |              |              |           |
|                 | Number of haplotypes      | RECENT        | 134        | 3,86E+00        | 2,73E+00        | 2,35E-01        | -6,78        | 0,000        | S         |
|                 |                           | CHRONIC       | 115        | 7,17E+00        | 4,82E+00        | 4,50E-01        |              |              |           |
| <b>GP120 V5</b> | <b>Percent complexity</b> | <b>RECENT</b> | <b>134</b> | <b>1,76E-04</b> | <b>4,19E-04</b> | <b>3,62E-05</b> | <b>-1,92</b> | <b>0,057</b> | <b>NS</b> |
|                 |                           | CHRONIC       | 115        | 2,67E-04        | 3,15E-04        | 2,94E-05        |              |              |           |
|                 | Percent diversity         | RECENT        | 134        | 2,78E-02        | 2,08E-02        | 1,79E-03        | -4,76        | 0,000        | S         |
|                 |                           | CHRONIC       | 115        | 4,61E-02        | 3,83E-02        | 3,58E-03        |              |              |           |
|                 | Shannon entropy index     | RECENT        | 134        | 2,39E-02        | 3,00E-02        | 2,59E-03        | -8,16        | 0,000        | S         |
|                 |                           | CHRONIC       | 115        | 7,48E-02        | 6,46E-02        | 6,02E-03        |              |              |           |
|                 | Number of haplotypes      | RECENT        | 134        | 3,22E+00        | 2,14E+00        | 1,85E-01        | -5,1         | 0,000        | S         |
|                 |                           | CHRONIC       | 115        | 5,15E+00        | 3,71E+00        | 3,46E-01        |              |              |           |

Sequence based diversity means of recent compare to chronic HIV-1 infected individuals with t-test results.

*NS: Statistically nonsignificant      S: Statistically significant*
